# Supplementary figures and images for: Excited state electronic structure of dimethyl disulfide involved in photodissociation at ∼200 nm
Source: Royal Society of Chemistry journal article supplement (doi:10.1039/d4cp02505a), 2024-01-01

**S<sub>5</sub>**

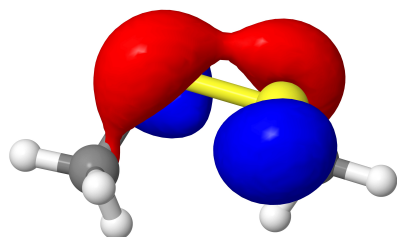

**HONTO**

**87%**

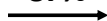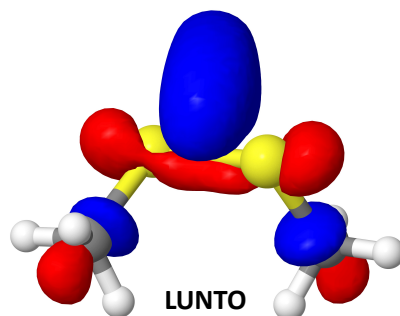

**LUNTO**

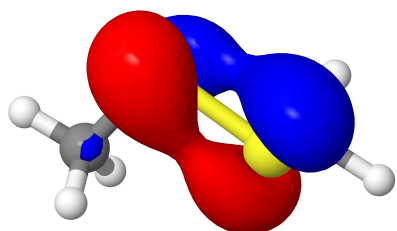

**HONTO-1**

**13%**

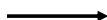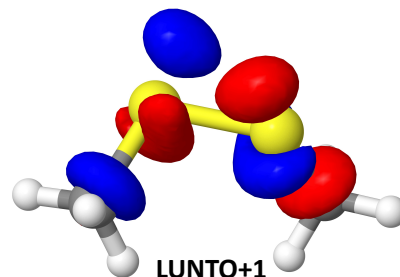

**LUNTO+1**

**S<sub>6</sub>**

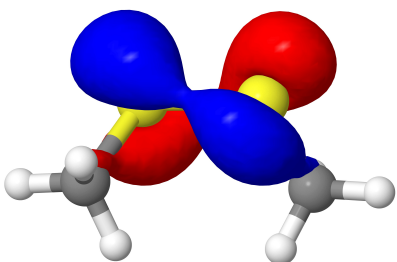

**HONTO**

**76%**

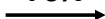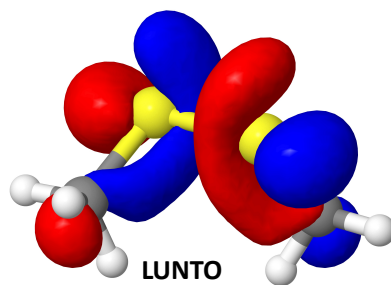

**LUNTO**

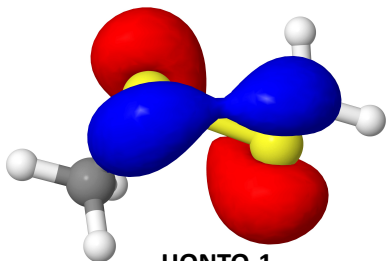

**HONTO-1**

**24%**

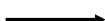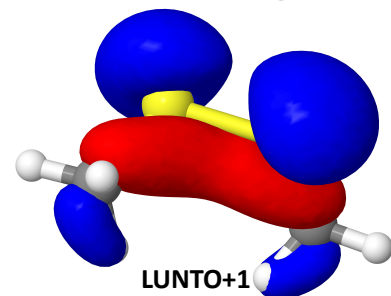

**LUNTO+1**

Supplement: d4cp02505a3.pdf [file d4cp02505a3.pdf]
